# Supplementary material
Source: PubMed Central journal article supplement (PMC6397672)
Supplement: NIHMS1012609-supplement-1.pdf [file NIHMS1012609-supplement-1.pdf]

**Supplemental Table 1:** Patient outcomes stratified by worst electroencephalographic pattern observed

| <b>Worst EEG pattern</b> | <b>Proportion (95% CI)</b>  |
|--------------------------|-----------------------------|
|                          | <u>Awakening</u>            |
| Never checked            | 119/309, 0.39 (0.33 – 0.44) |
| Nothing malignant        | 86/251, 0.34 (0.28 – 0.40)  |
| Epileptiform discharges  | 13/34, 0.38 (0.22 – 0.56)   |
| Periodic discharges      | 6/41, 0.15 (0.06 – 0.29)    |
| Seizures                 | 1/13, 0.08 (0.00 – 0.36)    |
| Polyspikes               | 4/170, 0.02 (0.01 – 0.06)   |
|                          | <u>Survival</u>             |
| Never checked            | 116/309, 0.38 (0.32 – 0.43) |
| Nothing malignant        | 73/251, 0.29 (0.24 – 0.35)  |
| Epileptiform discharges  | 11/34, 0.32 (0.17 – 0.50)   |
| Periodic discharges      | 11/41, 0.27 (0.14 – 0.43)   |
| Seizures                 | 2/13, 0.17 (0.02 – 0.48)    |
| Polyspikes               | 12/170, 0.07 (0.04 – 0.12)  |
|                          | <u>Discharge mRS 0-2</u>    |
| Never checked            | 30/309, 0.10 (0.07 – 0.14)  |
| Nothing malignant        | 22/251, 0.09 (0.06 – 0.13)  |
| Epileptiform discharges  | 1/34, 0.03 (0.00 – 0.15)    |
| Periodic discharges      | 0/41, 0 (0 – 0.09)          |
| Seizures                 | 0/13, 0 (0 – 0.25)          |
| Polyspikes               | 1/170, 0.01 (0.00 – 0.03)   |

**Supplemental Table 2:** Patient outcomes stratified by total number of antiepileptic drugs administered

| Total AEDs administered                  | Proportion (95% CI)       |
|------------------------------------------|---------------------------|
| Intermittent AEDs only                   |                           |
| <u>Awakening</u>                         |                           |
| 0                                        | 169/503, 0.34 (0.29-0.38) |
| 1                                        | 40/140, 0.29 (0.21-0.37)  |
| 2                                        | 15/95, 0.16 (0.09-0.25)   |
| 3+                                       | 5/80, 0.14 (0.07-0.23)    |
| <u>Survival</u>                          |                           |
| 0                                        | 154/503, 0.31 (0.27-0.35) |
| 1                                        | 38/140, 0.27 (0.20-0.35)  |
| 2                                        | 22/95, 0.23 (0.15-0.33)   |
| 3+                                       | 11/80, 0.14 (0.07-0.23)   |
| <u>Discharge mRS 0-2</u>                 |                           |
| 0                                        | 45/503, 0.09 (0.07-0.12)  |
| 1                                        | 6/140, 0.04 (0.02-0.09)   |
| 2                                        | 2/95, 0.02 (0.00-0.07)    |
| 3+                                       | 1/80, 0.01 (0.00-0.07)    |
| Intermittent AEDs + midazolam            |                           |
| <u>Awakening</u>                         |                           |
| 0                                        | 88/312, 0.28 (0.23-0.34)  |
| 1                                        | 96/238, 0.40 (0.34-0.47)  |
| 2                                        | 30/110, 0.27 (0.19-0.37)  |
| 3                                        | 13/85, 0.15 (0.08-0.25)   |
| 4+                                       | 2/73, 0.03 (0.00-0.10)    |
| <u>Survival</u>                          |                           |
| 0                                        | 82/312, 0.26 (0.21-0.32)  |
| 1                                        | 87/238, 0.37 (0.30-0.43)  |
| 2                                        | 30/110, 0.27 (0.19-0.37)  |
| 3                                        | 19/85, 0.22 (0.14-0.33)   |
| 4+                                       | 7/73, 0.10 (0.04-0.19)    |
| <u>Discharge mRS 0-2</u>                 |                           |
| 0                                        | 22/312, 0.07 (0.04-0.10)  |
| 1                                        | 27/238, 0.11 (0.08-0.16)  |
| 2                                        | 2/110, 0.02 (0.00-0.06)   |
| 3                                        | 2/85, 0.02 (0.00-0.08)    |
| 4+                                       | 1/73, 0.01 (0.00-0.07)    |
| Intermittent AEDs + propofol + midazolam |                           |
| <u>Awakening</u>                         |                           |
| 0                                        | 44/226, 0.19 (0.15-0.25)  |
| 1                                        | 71/177, 0.40 (0.33-0.48)  |
| 2                                        | 77/175, 0.44 (0.37-0.52)  |
| 3                                        | 25/99, 0.25 (0.17-0.35)   |
| 4                                        | 10/76, 0.13 (0.06-0.23)   |
| 5+                                       | 2/65, 0.03 (0.00-0.11)    |
| <u>Survival</u>                          |                           |
| 0                                        | 43/226, 0.19 (0.14-0.25)  |
| 1                                        | 58/177, 0.33 (0.26-0.40)  |

|    |                          |
|----|--------------------------|
| 2  | 75/175, 0.43 (0.35-0.51) |
| 3  | 24/99, 0.24 (0.16-0.34)  |
| 4  | 18/76, 0.24 (0.15-0.35)  |
| 5+ | 7/65, 0.11 (0.04-0.21)   |

Discharge mRS 0-2

|    |                          |
|----|--------------------------|
| 0  | 12/226, 0.05 (0.03-0.09) |
| 1  | 16/177, 0.09 (0.05-0.14) |
| 2  | 21/175, 0.12 (0.08-0.18) |
| 3  | 2/99, 0.02 (0.00-0.07)   |
| 4  | 2/76, 0.03 (0.00-0.09)   |
| 5+ | 1/65, 0.02 (0.00-0.08)   |

---

**Supplemental Table 3:** Total number of intermittent antiepileptic drugs administered, not including propofol and midazolam, stratified by worst EEG pattern detected and Center. Center 1 data are presented in the top of each cell, while Center 2 data are presented in the bottom of each cell.

| Worst EEG pattern detected                 | Center    | Number of antiepileptic drugs (AEDs) administered |                    |                    |                     |
|--------------------------------------------|-----------|---------------------------------------------------|--------------------|--------------------|---------------------|
|                                            |           | 0 AED<br>(n = 503)                                | 1 AED<br>(n = 140) | 2 AEDs<br>(n = 95) | 3+ AEDs<br>(n = 85) |
| <b>Never checked</b><br>(n = 309)          | Center 1: | 131 (88)                                          | 11 (7)             | 3 (2)              | 4 (3)               |
|                                            | Center 2: | 148 (93)                                          | 7 (4)              | 5 (3)              | 0 (0)               |
| <b>Nothing epileptiform</b><br>(n = 251)   | Center 1: | 130 (77)                                          | 30 (18)            | 8 (5)              | 0 (0)               |
|                                            | Center 2: | 52 (63)                                           | 24 (29)            | 6 (7)              | 1 (1)               |
| <b>Non-periodic discharges</b><br>(n = 34) | Center 1: | 5 (20)                                            | 14 (56)            | 3 (12)             | 3 (12)              |
|                                            | Center 2: | 1 (11)                                            | 7 (78)             | 0 (0)              | 1 (11)              |
| <b>Periodic discharges</b><br>(n = 41)     | Center 1: | 7 (23)                                            | 6 (20)             | 6 (20)             | 11 (37)             |
|                                            | Center 2: | 0 (0)                                             | 5 (45)             | 2 (18)             | 4 (36)              |
| <b>Seizures</b><br>(n = 13)                | Center 1: | 0 (0)                                             | 1 (9)              | 5 (45)             | 5 (45)              |
|                                            | Center 2: | 0 (0)                                             | 0 (0)              | 1 (50)             | 1 (50)              |
| <b>Polyspike burst</b><br>(n = 170)        | Center 1: | 13 (10)                                           | 22 (17)            | 48 (37)            | 47 (36)             |
|                                            | Center 2: | 16 (40)                                           | 13 (33)            | 8 (20)             | 3 (8)               |

**Data are presented as raw number with corresponding row percentages.**
